# Supplementary material for: Interleukin-1 blockade overcomes erlotinib resistance in head and neck squamous cell carcinoma
Source: PubMed Central journal article supplement (PMC5342798; doi:10.18632/oncotarget.12590), 2016-10-12
Supplement: oncotarget-07-76087-s001.pdf [file oncotarget-07-76087-s001.pdf]

## Interleukin-1 blockade overcomes erlotinib resistance in head and neck squamous cell carcinoma

### SUPPLEMENTARY FIGURES AND TABLES

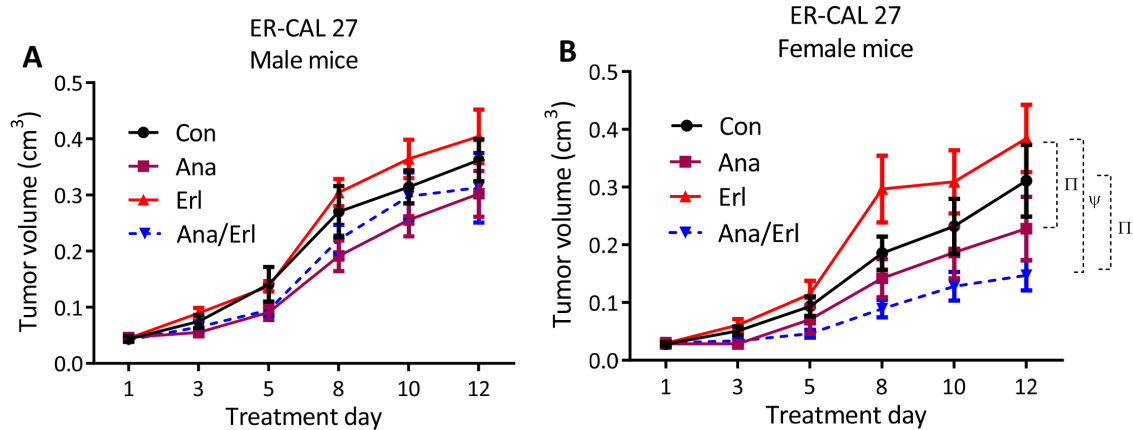

**Supplementary Figure S1: Effect of IL-1 blockade on growth of erlotinib-resistant CAL 27 xenografts.** Erlotinib-resistant CAL 27 tumor bearing male **A.** and female **B.** mice were treated with reagent grade water (Con), erlotinib (Erl), anakinra (Ana) or erlotinib+anakinra (Ana+Erl) for 2 weeks. Tumor volumes were plotted against days since treatment initiation. Tumor growth graphs were interrupted at the time point where the mice (in any of the treatment groups) began to reach euthanasia criteria due to tumor size or ulcerating tumors. N = 5-6 mice per treatment group. Error bars represent  $\pm$  SEM. <sup>†</sup> $p < 0.01$ , <sup>‡</sup> $p < 0.0001$ .

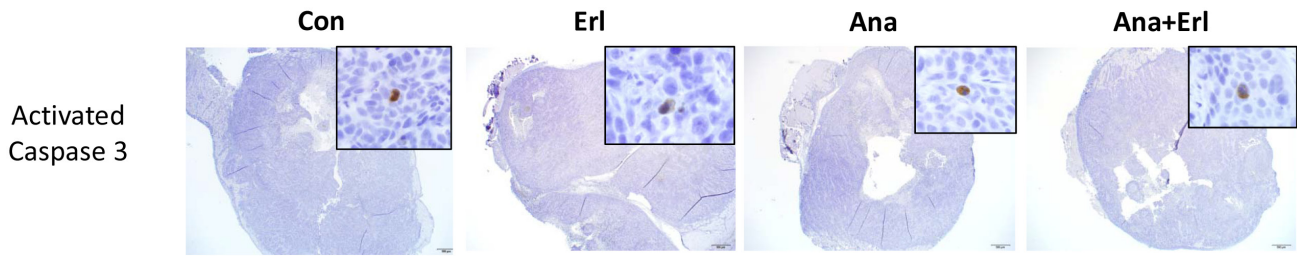

**Supplementary Figure S2: Caspase 3 immunostaining of tumor sections from ER-SQ20B xenografts.** Images represent low (100x) and high (insets; 200x) magnification images of (formalin fixed paraffin embedded) tumor sections of ER-SQ20B xenografts harvested from mice treated with either reagent grade water (Con), erlotinib (Erl), anakinra (Ana) or erlotinib+anakinra (Ana+Erl), and immunostained with caspase 3 **A-D**. Each image is a representative of 3 tumor sections per group.

**Supplementary Table S1: Mean values of cytokines and chemokines in mouse sera harboring ER-SQ20B and ES-SQ20B xenografts**

| S. No | Analyte name   | ER-SQ20B |          |          |          | ES-SQ20B |          |          |          |
|-------|----------------|----------|----------|----------|----------|----------|----------|----------|----------|
|       |                | Con      | Ana      | Erl      | Ana/Erl  | Con      | Ana      | Erl      | Ana/Erl  |
| 1     | IL-1 $\alpha$  | 429.04   | 328.04   | 513.49   | 381.77   | 409.43   | 445.00   | 262.05   | 384.62   |
| 2     | IL-1 $\beta$   | 20470.97 | 18599.33 | 19062.88 | 16929.72 | 22369.26 | 18520.77 | 16142.87 | 21874.55 |
| 3     | IL-6           | 783.90   | 1641.4   | 881.01   | 496.73   | 3086.17  | 559.51   | 407.51   | 603.90   |
| 4     | IL-10          | 1537.49  | 2361.26  | 1476.59  | 1585.65  | 1920.27  | 1159.17  | 1216.61  | 1615.36  |
| 5     | IL-12p40       | 775.87   | 1558.19  | 976.03   | 662.54   | 1305.01  | 1100.22  | 1607.7   | 827.52   |
| 6     | IL-12p70       | 16036.21 | 25816.43 | 21093.08 | 21909.25 | 24790.03 | 18487.5  | 21408.9  | 24299.67 |
| 7     | IL-17A         | 8352.79  | 9872.44  | 8316.59  | 10998.64 | 9363.22  | 6042.03  | 10719.24 | 4829.17  |
| 8     | G-CSF          | 6927.53  | 2388.51  | 6583.7   | 2109.24  | 9470.65  | 3730.97  | 2562.17  | 2503.73  |
| 9     | GM-CSF         | 3609.79  | 3438.63  | 3492.28  | 3289.25  | 4019     | 3060.90  | 2976.45  | 3232.22  |
| 10    | IFN- $\gamma$  | 3288.32  | 3719.84  | 3633.49  | 3654.58  | 3806.40  | 3181.04  | 3129.58  | 3591.68  |
| 11    | KC             | 2991.46  | 3787.78  | 3239.73  | 2145.72  | 7824.58  | 1857.37  | 1871.22  | 1734.9   |
| 12    | MCP-1          | 18006.38 | 18647.32 | 17892.85 | 17041.33 | 18475.53 | 15825.53 | 14227.5  | 16986.81 |
| 13    | MIP-1 $\alpha$ | 1138.05  | 1206.23  | 1146.29  | 972.68   | 1305.63  | 919.79   | 899.80   | 1153.06  |
| 14    | MIP-1 $\beta$  | 2884.65  | 2837.63  | 2954.01  | 2712.24  | 3160.27  | 2575.14  | 2146.06  | 2641.29  |
| 15    | TNF- $\alpha$  | 30261.16 | 32736.19 | 32810.85 | 32997.13 | 34757.54 | 29676.18 | 24845.2  | 32143.51 |
| 16    | IL-23p19       | ND       | ND       | ND       | ND       | ND       | ND       | ND       | ND       |
| 17    | IL-33          | 228.07   | 273.79   | 241.18   | 260.67   | 297.75   | 250.65   | 247.74   | 255.41   |

Note: Con = Control; Ana = Anakinra; Erl = Erlotinib; Ana/Erl = Anakinra + Erlotinib. ND = not detectable.

Supplementary Table S2: List of primers for RT-PCR

| Gene          | Forward primer (5'→3') | Reverse primer (5'→3') |
|---------------|------------------------|------------------------|
| <i>IL1A</i>   | CCGTGAGTTTCCCAGAAGAA   | ACTGCCCAAGATGAAGACCA   |
| <i>IL1B</i>   | AAGCCCTTGCTGTAGTGGTG   | GAAGCTGATGGCCCTAAACA   |
| <i>IL1RA</i>  | GCTTGCACTTGCTGGATTT    | CCTCAGAAGACCTCCTGTCT   |
| <i>IL1R1</i>  | TTGGGTAAAGAGGACAGGGA   | TGATTTCTTCTCTGGAGGCTG  |
| <i>IL1R2</i>  | ACAACTTCCAGAGGACACGG   | CCTGCTGGAGGTGAAAGTCT   |
| <i>IL1RAP</i> | ATTAAAGGGAGGGGCAAGAG   | CCTCTCAGCTTCCAAGAAA    |
| <i>MYD88</i>  | TCCTGCTGCTGCTTCAAGAT   | GACTGCTCGAGCTGCTTACC   |
| <i>TOLLIP</i> | CGGGAGCTCACCGATGT      | GTCACTGTCCGGTCCGGC     |
| <i>IRAK4</i>  | TAGTCCAACATTGAGGCAGC   | GTTCTTCTGTCCGGCTT      |
| <i>IRAK1</i>  | CTTCTCAAAGCCACTCCAGC   | GAGACCTTGGCTGGTCAGAG   |
| <i>TRAF6</i>  | GCCACACAGCAGTCACTTTC   | TCCCCGCGCACTAGAAC      |
| <i>CXCL8</i>  | AAATTTGGGGTGGAAAGGTT   | TCCTGATTTCTGCAGCTCTGT  |
| <i>CCL2</i>   | AGGTGACTGGGGCATTGAT    | GCCTCCAGCATGAAAGTCTC   |
| <i>PTGS2</i>  | CCGGGTACAATCGCACTTAT   | GGCGCTCAGCCATACAG      |
| <i>NFKBIA</i> | AAAGCCAGGTCTCCCTTAC    | CAGCAGCTCACCGAGGAC     |
| <i>DUSP1</i>  | CAGTGGACAAACACCCTTCC   | AGGACAACCACAAGGCAGAC   |
| <i>GAPDH</i>  | AATGAAGGGG TCATTGATGG  | AAGGTGAAGGTCCGAGTCAA   |
| <i>18S</i>    | CCTTGGATGTGGTAGC CGTTT | AACTTTCGATGGTAGTCGCCG  |

Supplementary Table S3: List of cytokines and chemokines analyzed by Bio-Plex assay

| S. No | Analyte name   | lower limit (pg/ml) | higher limit (pg/ml) |
|-------|----------------|---------------------|----------------------|
| 1     | IL-1 $\alpha$  | 1.28                | 20970                |
| 2     | IL-1 $\beta$   | 3.82                | 62650                |
| 3     | IL-6           | 1.27                | 20832                |
| 4     | IL-10          | 1.2                 | 19679                |
| 5     | IL-12p40       | 1.58                | 25894                |
| 6     | IL-12p70       | 3.2                 | 52439                |
| 7     | IL-17A         | 2.73                | 44706                |
| 8     | G-CSF          | 4.73                | 77459                |
| 9     | GM-CSF         | 1.58                | 25858                |
| 10    | IFN- $\gamma$  | 0.81                | 13205                |
| 11    | KC             | 2.01                | 32958                |
| 12    | MCP-1          | 1.97                | 32200                |
| 13    | MIP-1 $\alpha$ | 0.89                | 14653                |
| 14    | MIP-1 $\beta$  | 0.62                | 10197                |
| 15    | TNF- $\alpha$  | 3.36                | 55115                |
| 16    | IL-23p19       | 7.85                | 128603               |
| 17    | IL-33          | 1.11                | 18119                |
